# Supplementary material for: Dynamics of nitrogen and active nitrogen components across seasons under varying stand densities in a Larix principis-rupprechtii (Pinaceae) plantation
Source: PeerJ. 2018 Sep 28;6:e5647. doi: 10.7717/peerj.5647 (PMC6166636; doi:10.7717/peerj.5647)
Supplement: Supplemental Information 1 — The data was collected from spring of 2015 to autumn of 2016, we have collected the data for 2 years. [file peerj-06-5647-s001.xlsx]

## Sheet: 工作表1
			Spring of 2015																Summer of 2015																Autumn of 2015
			SOC	TN	C/N	DON	MBN	MBC	DOC	pH	DOC/SOC	MBC/SOC	DON/TN	MBN/TN	DOC/DON	MBC/MBN			SOC	TN	C/N	DON	MBN	MBC	DOC	pH	DOC/SOC	MBC/SOC	DON/TN	MBN/TN	DOC/DON	MBC/MBN			SOC	TN	C/N	DON	MBN	MBC	DOC	pH	DOC/SOC	MBC/SOC	DON/TN	MBN/TN	DOC/DON	MBC/MBN
	CK	F1-1	36.85	2.95	12.4915	48.8016	12.2407	782.889	97.867	6.18	2.12453	0.265582	1.65429	0.41494	2.00541	63.9577		F1-1	51.56	3.91	13.1867	214.369	63.6435	1353.09	495.439	5.51	2.6243	0.960898	5.48259	1.62771	2.31115	21.2604		F1-1	59.9736	4.36	13.7554	130.802	54.5157	2880.96	304.075	6.04	4.80372	0.507014	3.00004	1.25036	2.3247	52.8464
		F1-2	36.93	2.96	12.4764	40.5828	10.8704	582.328	87.8	6.44	1.57684	0.237747	1.37104	0.367242	2.16348	53.5702		F1-2	36.13	2.84	12.7218	194.833	34.7135	1781.79	430.564	6.14	4.93161	1.19171	6.8603	1.22231	2.20992	51.3284		F1-2	49.3805	3.5	14.1087	118.583	38.9511	1567.91	296.392	6.76	3.17517	0.600221	3.38808	1.11289	2.49945	40.2534
		F1-3	31.88	2.37	13.4515	38.9034	7.00571	421.3	60.145	6.71	1.32152	0.188661	1.64149	0.2956	1.54601	60.1367		F1-3	31.6	2.35	13.4468	212.218	41.0057	1527.45	414.907	6.05	4.83372	1.313	9.03054	1.74492	1.9551	37.2498		F1-3	42.1254	2.73	15.4306	102.49	18.4641	1292.1	190.874	6.15	3.06727	0.453109	3.75422	0.676342	1.86236	69.9789
		F1-4	27.97	1.94	14.4175	36.5808	1.49282	420.1	60.124	6.51	1.50197	0.214959	1.88561	0.0769493	1.6436	281.415		F1-4	30.04	2.26	13.292	203.477	1.49282	1457.38	349.215	6.59	4.85147	1.1625	9.00341	0.0660538	1.71624	976.263		F1-4	35.8141	2.32	15.4371	103.458	14.5254	1910.96	202.545	6.54	5.33577	0.565545	4.4594	0.626097	1.95775	131.559
		F1-5	23.55	1.96	12.0153	30.0804	5.00535	3	50.013	6.9	0.0127389	0.212369	1.53471	0.255375	1.66264	0.599359		F1-5	37.25	2.98	12.5	200.081	21.0053	1541.71	307.978	6.57	4.13882	0.826786	6.71412	0.704877	1.53927	73.3961		F1-5	30.9134	1.99	15.5343	100.208	9.95096	1827.17	135.03	6.7	5.91061	0.436801	5.03558	0.500048	1.3475	183.617
		F5-1	42.26	3.47	12.1787	42.3312	7.44444	587.888	132.09	5.52	1.39112	0.312565	1.21992	0.214537	3.1204	78.97		F5-1	55.29	4.38	12.6233	233.261	59.2386	1944.03	542.63	5.73	3.51606	0.981426	5.3256	1.35248	2.32628	32.817		F5-1	62.5141	4.68	13.3577	121.433	50.5441	2002.13	281.346	5.85	3.20269	0.450052	2.59472	1.08	2.31688	39.6116
		F5-2	41.98	3.55	11.8254	36.1484	11.2222	772.653	116.55	5.89	1.84053	0.277632	1.01826	0.316119	3.22421	68.8503		F5-2	31.41	2.47	12.7166	202.537	35.4885	2078.5	444.648	5.52	6.61731	1.41563	8.19988	1.43678	2.19539	58.5682		F5-2	46.2817	3.29	14.0674	96.1484	41.7313	1841.11	249.25	6.27	3.97806	0.53855	2.92244	1.26843	2.59235	44.1183
		F5-3	28.42	2.38	11.9412	30.2199	5.21	600.32	94.234	5.72	2.11232	0.331576	1.26974	0.218908	3.11828	115.225		F5-3	25.98	1.92	13.5312	203.843	18.3854	1424.1	366.049	6.49	5.48153	1.40897	10.6168	0.957571	1.79574	77.4584		F5-3	33.9092	2.27	14.938	100.22	32.3798	1656.77	221.629	6.25	4.8859	0.653595	4.41497	1.42642	2.21143	51.1669
		F5-4	24.86	1.61	15.441	34.8945	3.43	586.32	80.324	5.97	2.35849	0.323105	2.16736	0.213043	2.30191	170.939		F5-4	26.22	1.92	13.6562	212.299	5.77386	1401.99	280.71	6.45	5.34703	1.07059	11.0572	0.300722	1.32224	242.817		F5-4	18.8613	1.01	18.6746	98.4895	27.8199	2179.3	185.769	6.44	11.5543	0.984918	9.75143	2.75444	1.88618	78.3362
		F5-5	25.1	1.62	15.4938	31.4151	4.22	587.12	74.324	5.9	2.33912	0.296112	1.9392	0.260494	2.36587	139.128		F5-5	24.08	1.76	13.6818	195.12	18.0803	1358.32	295.127	6.47	5.64087	1.22561	11.0864	1.02729	1.51254	75.1273		F5-5	14.1724	0.78	18.1697	111.415	17.5796	1863.17	207.566	6.36	13.1465	1.46458	14.284	2.25379	1.86299	105.985
		F10-1	39.125	3	13.0417	43.5664	9.54259	673.388	102.978	5.82	1.72112	0.263204	1.45221	0.318086	2.36372	70.5666		F10-1	52.995	3.935	13.4676	218.815	61.441	1636.56	507.035	5.59	3.08814	0.95676	5.56074	1.5614	2.31718	26.6363		F10-1	60.8139	4.31	14.1099	121.117	52.5299	2429.55	280.71	5.915	3.99505	0.46159	2.81015	1.21879	2.31767	46.2507
		F10-2	39.025	3.045	12.8161	36.3656	10.7463	665.491	90.175	6.135	1.70529	0.23107	1.19427	0.352916	2.47968	61.9274		F10-2	33.34	2.445	13.636	193.685	35.101	1918.14	425.606	5.8	5.75328	1.27656	7.92167	1.43562	2.19742	54.6464		F10-2	47.4011	3.185	14.8826	102.366	40.3412	1692.51	260.821	6.485	3.57062	0.550242	3.21399	1.2666	2.54794	41.955
		F10-3	29.72	2.165	13.7275	32.5616	5.80785	498.81	65.1895	6.185	1.67836	0.219346	1.504	0.268261	2.00203	85.8854		F10-3	28.36	1.925	14.7325	203.03	29.6955	1463.78	378.478	6.24	5.16141	1.33455	10.547	1.54263	1.86415	49.2928		F10-3	37.5873	2.29	16.4137	96.3551	25.422	1462.44	194.252	6.17	3.89077	0.516801	4.20765	1.11013	2.016	57.5265
		F10-4	25.985	1.565	16.6038	33.7377	2.16141	491.21	58.224	6.21	1.89036	0.224068	2.15576	0.138109	1.72579	227.264		F10-4	27.7	1.88	14.734	202.888	3.63334	1417.69	302.963	6.49	5.118	1.09373	10.7919	0.193263	1.49325	390.188		F10-4	26.9077	1.455	18.4933	95.9738	21.1727	2033.13	182.157	6.46	7.55594	0.676969	6.59614	1.45517	1.89798	96.0262
		F10-5	23.895	1.58	15.1234	28.7478	4.31267	283.06	50.1685	6.37	1.1846	0.209954	1.81948	0.272954	1.74513	65.6345		F10-5	30.235	2.16	13.9977	192.6	19.5428	1438.02	289.553	6.49	4.75613	0.957673	8.91668	0.904759	1.50339	73.5829		F10-5	22.1129	1.175	18.8194	100.812	13.7653	1833.17	159.298	6.5	8.29005	0.720386	8.57971	1.17151	1.58015	133.173
	LT	F6-1	37.4	3.05	12.2623	41.7371	8.5	661.996	122.17	5.84	1.77004	0.326658	1.36843	0.278689	2.92714	77.8818		F6-1	54.74	4.39	12.4692	212.506	67.9972	2109	531.211	5.69	3.85276	0.970425	4.84067	1.54891	2.49975	31.016		F6-1	52.2548	3.84	13.608	127.737	49.6565	2338.13	352.867	5.72	4.47447	0.675281	3.32649	1.29314	2.76245	47.086
		F6-2	32.47	2.52	12.8849	42.7395	4.64815	657.564	101.02	5.73	2.02514	0.311118	1.69601	0.18445	2.36362	141.468		F6-2	39.63	3.2	12.3844	192.582	42.2962	1807.84	434.951	6.19	4.5618	1.09753	6.01817	1.32176	2.25853	42.7424		F6-2	26.1822	2.9	9.02836	102.74	52.4036	1554.03	288.54	6.19	5.93543	1.10204	3.54274	1.80702	2.80846	29.655
		F6-3	31.7	2.38	13.3193	40.9504	7.65	653.21	85.632	5.81	2.0606	0.270132	1.7206	0.321429	2.09112	85.3869		F6-3	35.42	2.76	12.8333	202.526	25.9945	1327.21	370.517	6.3	3.74708	1.04607	7.3379	0.941829	1.82948	51.0575		F6-3	40.2409	1.44	27.945	120.95	15.8635	1596.99	224.936	5.97	3.96858	0.558975	8.39933	1.10163	1.85974	100.671
		F6-4	23.87	1.58	15.1076	36.0567	8.88	580.32	79.212	6.13	2.43117	0.331848	2.28207	0.562025	2.19687	65.3514		F6-4	32.33	2.42	13.3595	198.262	15.84	1375.35	359.553	6.47	4.25409	1.11213	8.19265	0.654548	1.81352	86.8272		F6-4	25.8751	1.59	16.2736	96.0567	16.6851	1854.24	225.834	6.34	7.16612	0.872786	6.0413	1.04938	2.35105	111.131
		F6-5	21.56	1.41	15.2908	30.1934	6.53	550.21	77.3576	5.9	2.55199	0.358801	2.14137	0.463121	2.56207	84.2588		F6-5	26.32	1.93	13.6373	196.763	9.73206	1309.54	287.288	6.69	4.97546	1.09152	10.195	0.504252	1.46007	134.559		F6-5	23.4725	1.4	16.766	100.193	16.2159	1521.28	180.465	6.06	6.48112	0.768839	7.15667	1.15828	1.80117	93.814
		F2-1	40.1	2.94	13.6395	40.9286	15.4444	935.905	126.77	5.84	2.33393	0.316135	1.39213	0.525321	3.09734	60.5982		F2-1	56.23	4.49	12.5234	209.629	59.1506	1292.15	509.026	5.73	2.29796	0.905256	4.6688	1.31738	2.42822	21.845		F2-1	69.2529	4.57	15.1538	116.493	46.6893	2471.5	315.106	5.54	3.5688	0.455008	2.54908	1.02165	2.70494	52.935
		F2-2	37.85	2.89	13.0969	39.0444	14.7778	793.067	114.97	6.34	2.09529	0.303752	1.35102	0.511342	2.9446	53.6662		F2-2	35.7	2.83	12.6148	192.311	40.7188	1639.25	384.105	6.54	4.59173	1.07592	6.79546	1.43883	1.99731	40.2577		F2-2	42.4809	3.01	14.1133	103.604	8.5	1200	246.764	6.06	2.8248	0.580883	3.44201	0.282392	2.38179	141.176
		F2-3	28.83	2.02	14.2723	33.7812	8.5	623.21	92.231	6.47	2.16167	0.319913	1.67233	0.420792	2.73025	73.3188		F2-3	35.48	2.77	12.8087	200.232	18.2858	1557.91	360.29	6.31	4.39095	1.01547	7.22859	0.660138	1.79937	85.1976		F2-3	30.7298	2.04	15.0636	120.378	8.27973	1111.88	254.98	6.14	3.61825	0.829748	5.90089	0.405869	2.11816	134.289
		F2-4	29.58	1.91	15.4869	35.9019	5.2	600.21	92.456	6.98	2.02911	0.312563	1.87968	0.272251	2.57524	115.425		F2-4	26.64	1.85	14.4	205.811	12.5922	1327.85	321.503	6.33	4.98442	1.20684	11.1249	0.680657	1.56213	105.45		F2-4	31.8803	2.01	15.8608	105.902	15.1272	1611.68	229.507	6.15	5.05542	0.719903	5.26875	0.752598	2.16717	106.542
		F2-5	23.35	1.6	14.5938	32.0079	5.8	599.21	80.231	6.92	2.56621	0.343602	2.00049	0.3625	2.5066	103.312		F2-5	26.62	1.91	13.9372	200.85	17.8788	1387.02	331.665	6.83	5.21044	1.24592	10.5157	0.936061	1.6513	77.5792		F2-5	29.3744	1.82	16.1398	102.008	77.3416	2415.53	154.862	6.1	8.22325	0.527201	5.60483	4.24954	1.51814	31.2319
		F3-1	45.53	3.76	12.109	41.53	14.6111	947.15	162.13	5.84	2.08028	0.356095	1.10452	0.388593	3.90392	64.8239		F3-1	57.58	4.64	12.4095	226.561	64.5124	1693.75	590.057	5.83	2.94155	1.02476	4.88278	1.39035	2.6044	26.2546		F3-1	59.2088	4.32	13.7057	124.53	48.2488	2510.93	304.64	5.79	4.24081	0.514519	2.88264	1.11687	2.44632	52.0413
		F3-2	42.58	3.56	11.9607	39.6037	9.51852	793.107	106.98	5.93	1.86263	0.251245	1.11246	0.267374	2.70126	83.3225		F3-2	46.96	3.85	12.1974	184.262	46.8173	2118.84	447.79	6.21	4.512	0.953557	4.78604	1.21603	2.43018	45.2576		F3-2	49.3335	3.71	13.2974	102.604	46.1749	1282.03	234.702	6.23	2.59869	0.475745	2.7656	1.24461	2.28746	27.7645
		F3-3	31.22	2.19	14.2557	38.1037	8.45	744.21	80.324	0	2.38376	0.257284	1.7399	0.385845	2.10803	88.0722		F3-3	34.49	2.54	13.5787	200.232	9.39921	1299.44	361.284	6.53	3.76759	1.0475	7.88314	0.370048	1.80433	138.25		F3-3	40.8871	2.91	14.0506	112.104	24.3306	1643.51	246.171	6.16	4.01962	0.602075	3.85236	0.836105	2.19592	67.5488
		F3-4	27.68	1.54	17.974	32.2981	7.55	700.21	76.554	6.15	2.52966	0.276568	2.09728	0.49026	2.37023	92.743		F3-4	30.55	2	15.275	203.273	1.95022	1384.89	331.711	6.54	4.5332	1.0858	10.1636	0.0975111	1.63185	710.12		F3-4	31.1279	1.75	17.7874	100.298	15.8083	1948.66	193.188	6.33	6.26017	0.620628	5.73132	0.90333	1.92614	123.268
		F3-5	22.43	1.23	18.2358	30.2962	6.54	687.23	70.123	6.28	3.06389	0.31263	2.46311	0.531707	2.31458	105.081		F3-5	23.32	1.55	15.0452	190.264	24.4952	1284.8	275.175	6.51	5.50945	1.18	12.2751	1.58034	1.44628	52.4512		F3-5	24.9	1.63	15.2761	100.83	11.6047	1308.75	162.476	6.05	5.25601	0.652514	6.18587	0.711947	1.61139	112.777
	MT	F9-1	58.05	5.1	11.3824	43.239	19.537	627.351	168.52	5.36	1.08071	0.290301	0.847823	0.383079	3.89741	32.1108		F9-1	57.9	4.94	11.7206	220.142	71.4948	2207.13	574.23	5.77	3.81197	0.991761	4.45631	1.44726	2.60846	30.8712		F9-1	57.0483	4.77	11.9598	113.239	23.008	1585.6	247.294	5.83	2.7794	0.433482	2.37398	0.482348	2.18382	68.915
		F9-2	47.42	3.99	11.8847	40.9387	13.4444	559.621	133.73	5.72	1.18014	0.282012	1.02603	0.336953	3.26659	41.6247		F9-2	46.41	3.94	11.7792	198.149	47.9095	2028.29	395.78	6.28	4.37036	0.852789	5.02917	1.21598	1.99738	42.3358		F9-2	45.4766	3.92	11.6012	97.5894	17.759	1312.86	217.65	6.18	2.88688	0.478597	2.48953	0.453036	2.23026	73.9263
		F9-3	40.95	3.14	13.0414	34.1256	11.43	523.21	112.87	6	1.27768	0.275629	1.0868	0.364013	3.30749	45.7752		F9-3	44.82	3.71	12.0809	211.079	27.8741	1628.06	423.375	6.08	3.63245	0.944612	5.68947	0.751323	2.00576	58.4078		F9-3	41.9594	3.66	11.4643	134.126	51.1308	2786.49	177.862	6.31	6.6409	0.423891	3.66463	1.39702	1.32609	54.4972
		F9-4	37.12	2.77	13.4007	33.99	7.22	490.21	100.794	5.81	1.32061	0.271536	1.22707	0.26065	2.9654	67.8961		F9-4	36.41	2.76	13.192	195.159	21.0397	1372.87	339.043	6.3	3.77059	0.931182	7.07098	0.762306	1.73727	65.2516		F9-4	35.7985	2.77	12.9237	98.299	47.1324	2270.26	192.736	6.4	6.34177	0.53839	3.5487	1.70153	1.96071	48.1678
		F9-5	25.22	1.75	14.4114	34.8515	4.32	454.2	81.234	5.89	1.80095	0.322102	1.99151	0.246857	2.33086	105.139		F9-5	35.77	2.85	12.5509	214.832	18.2813	1846.03	335.117	6.33	5.16085	0.936866	7.53797	0.64145	1.5599	100.979		F9-5	27.7656	2.03	13.6776	86.4851	42.8381	3030.67	141.095	6.4	10.9152	0.508164	4.26035	2.11025	1.63143	70.7471
		F11-1	55.88	5.09	10.9784	42.3023	17.9259	736.023	168.24	5.73	1.31715	0.301074	0.831087	0.352179	3.97708	41.0591		F11-1	58.31	5.19	11.2351	210.389	70.0647	2403.43	497.173	5.68	4.12181	0.852638	4.05374	1.34999	2.36311	34.303		F11-1	59.2433	5.41	10.9507	119.43	47.9318	1496.69	238.182	6.16	2.52634	0.40204	2.20758	0.885985	1.99432	31.2254
		F11-2	49.55	4.43	11.1851	39.2072	10.4444	649.982	81.03	5.74	1.31177	0.163532	0.885038	0.235766	2.06671	62.2323		F11-2	46.31	4.21	11	218.82	37.2063	1961.69	426.907	6.15	4.23599	0.921846	5.19762	0.883761	1.95095	52.7246		F11-2	52.1429	4.45	11.7175	79.2072	40.1583	1634.46	161.108	6.43	3.13458	0.308973	1.77994	0.902433	2.034	40.7005
		F11-3	38.73	3.11	12.4534	37.8361	10.54	534.21	94.2	5.92	1.37932	0.243222	1.21659	0.338907	2.48969	50.6841		F11-3	42.85	3.7	11.5811	226.447	41.1607	1559.15	485.046	6.44	3.63862	1.13196	6.1202	1.11245	2.14198	37.8795		F11-3	34.5432	2.55	13.5464	97.8361	28.474	2680.41	187.683	6.51	7.75958	0.543327	3.83671	1.11663	1.91834	94.1354
		F11-4	31.47	2.1	14.9857	35.0169	9.43	512.22	82.1	6.17	1.62765	0.260883	1.66747	0.449048	2.34458	54.3181		F11-4	32.54	2.57	12.6615	196.45	17.1024	1424.49	361.146	6.6	4.37766	1.10985	7.64395	0.665464	1.83837	83.2918		F11-4	28.2979	2.53	11.1849	95.0169	37.9969	2190.59	219.172	6.63	7.74118	0.774519	3.75561	1.50185	2.30667	57.6518
		F11-5	20.18	1.1	18.3455	30.2496	4.33	499.32	59.331	6.83	2.47433	0.294009	2.74996	0.393636	1.96138	115.316		F11-5	31.27	2.24	13.9598	194.241	17.9732	1480.27	320.524	6.8	4.73385	1.02502	8.67147	0.802376	1.65014	82.3599		F11-5	27.0629	2.04	13.2661	90.925	21.8699	2224.84	144.877	6.44	8.22101	0.535336	4.45711	1.07205	1.59337	101.731
		F7-1	52.41	4.83	10.8509	44.6	13.0926	1148.42	174.04	5.32	2.19123	0.332074	0.923395	0.271068	3.90224	87.7154		F7-1	58.16	5.1	11.4039	200.693	57.3492	2197.38	471.845	5.77	3.77817	0.811287	3.93516	1.12449	2.35107	38.3158		F7-1	58.1232	4.25	13.6761	124.6	47.4829	1382.89	254.418	5.88	2.37925	0.437722	2.93176	1.11725	2.04188	29.124
		F7-2	49.36	3.29	15.003	42.7344	11.6481	659.096	133.68	5.82	1.33528	0.270827	1.29892	0.354047	3.12816	56.5838		F7-2	43.76	3.68	11.8913	196.281	38.8157	2047.79	469.863	6.28	4.67958	1.07373	5.33372	1.05478	2.39383	52.7566		F7-2	42.6703	3.07	13.8991	112.734	45.5085	1823.31	210.562	6.41	4.273	0.493461	3.67213	1.48236	1.86777	40.0652
		F7-3	34.12	2.83	12.0565	31.349	10.14	621.23	120.231	5.87	1.82072	0.352377	1.10774	0.358304	3.83524	61.2653		F7-3	40.75	3.44	11.8459	212.667	37.6209	1486.05	443.562	6.08	3.64676	1.0885	6.18217	1.09363	2.08571	39.5008		F7-3	39.3463	2.7	14.5727	101.349	2.23413	1451.02	184.142	6.49	3.68783	0.468005	3.75367	0.0827455	1.81691	649.48
		F7-4	29.47	2.24	13.1562	30.7774	9.54	590.32	76.543	5.97	2.00312	0.259732	1.37399	0.425893	2.48699	61.8784		F7-4	38.7	3.03	12.7723	202.167	28.2825	1433.57	335.644	6.3	3.70431	0.867298	6.67216	0.933415	1.66024	50.6874		F7-4	27.8842	2.12	13.1529	95.7774	13.9746	1936.08	154.762	6.77	6.94329	0.555017	4.5178	0.659179	1.61585	138.543
		F7-5	16.93	1.01	16.7624	30.3722	8.43	565.21	70.321	6.08	3.33851	0.415363	3.00715	0.834653	2.31531	67.0474		F7-5	31.7	2.51	12.6295	211.355	13.4686	1310.3	347.126	6.33	4.13345	1.09504	8.42052	0.536598	1.64238	97.2859		F7-5	32.5748	1.68	19.3898	98.3722	69.836	2920.2	148.095	6.63	8.96461	0.454631	5.85549	4.1569	1.50546	41.8151
	HT	F4-1	54.23	4.5	12.0511	42.2022	7.14815	509.644	130.13	5.69	0.939783	0.239959	0.937826	0.158848	3.08349	71.2974		F4-1	54.86	4.57	12.0044	208.571	67.9482	2103.55	515.577	5.93	3.83439	0.939804	4.56392	1.48683	2.47195	30.9581		F4-1	58.4853	4.21	13.892	119.72	60.2888	1948.66	294.365	5.83	3.33187	0.503315	2.84371	1.43204	2.45878	32.3221
		F4-2	39.72	3.06	12.9804	40.9961	9.53704	638.076	130.13	5.93	1.60644	0.327618	1.33974	0.311668	3.17421	66.9051		F4-2	44.59	3.62	12.3177	195.383	40.4151	2145.26	446.911	6.18	4.81108	1.00227	5.39733	1.11644	2.28736	53.0807		F4-2	48.2488	3.68	13.1111	115.4	16.2978	1308.75	263.918	5.86	2.7125	0.546995	3.13586	0.442875	2.287	80.3021
		F4-3	31.18	2.11	14.7773	41.7296	10.13	600.21	121.9	5.92	1.92498	0.390956	1.97771	0.480095	2.92119	59.2507		F4-3	41.4	3.32	12.4699	213.829	13.4127	1350.35	338.411	6.29	3.26172	0.817417	6.44064	0.403996	1.58262	100.678		F4-3	41.3145	2.88	14.3453	121.073	47.9428	1972.73	286.703	5.84	4.77492	0.693953	4.20392	1.66468	2.36802	41.1476
		F4-4	24.8	1.6	15.5	37.7773	6.55	587.32	110.43	6.13	2.36823	0.445282	2.36108	0.409375	2.92319	89.6672		F4-4	31.45	2.31	13.6147	201.256	12.8287	1461.55	336.355	6.51	4.64722	1.06949	8.71237	0.555353	1.67128	113.929		F4-4	35.3262	2.36	14.9687	97.9777	23.6826	1519.32	182.125	5.95	4.30082	0.515551	4.1516	1.0035	1.85884	64.1532
		F4-5	20.1	1.4	14.3571	36.6212	5.34	564.32	82.34	缺样	2.80756	0.409652	2.6158	0.381429	2.24842	105.678		F4-5	31.8	2.34	13.5897	195.12	9.2101	1457.75	297.47	6.42	4.58411	0.935439	8.33845	0.393594	1.52455	158.277		F4-5	30.346	1.81	16.7657	102.762	20.1905	1408.34	180.645	5.85	4.64095	0.595285	5.67747	1.1155	1.75789	69.7527
		F8-1	55.04	4.37	12.595	41.613	7.88889	395.743	137.55	5.43	0.71901	0.249909	0.952243	0.180524	3.30546	50.1646		F8-1	50.57	4.16	12.1562	213.516	68.7176	1832.39	486.658	5.91	3.62347	0.962345	5.1326	1.65186	2.27926	26.6655		F8-1	65.5082	4.8	13.6475	117.613	54.7868	1237.13	258.475	5.93	1.88851	0.394569	2.45027	1.14139	2.19767	22.5808
		F8-2	44.03	3.9	11.2897	41.8112	8.09259	492.019	112.87	5.76	1.11746	0.256348	1.07208	0.207502	2.69951	60.7987		F8-2	43	3.63	11.8457	196.523	44.2348	1751.04	427.991	6.18	4.07218	0.995327	5.41385	1.21859	2.17782	39.5851		F8-2	49.6071	3.75	13.2285	89.8112	37.4248	1313.56	203.814	6.26	2.64793	0.410856	2.39497	0.997994	2.26935	35.0987
		F8-3	42.42	3.38	12.5503	40.194	5.68094	521.23	93.213	6.12	1.22874	0.219738	1.18917	0.168075	2.31908	91.7507		F8-3	42.2	3.66	11.5301	199.717	25.6809	1469.47	376.857	6.35	3.48216	0.893025	5.45674	0.701665	1.88696	57.2203		F8-3	48.4825	3.57	13.5805	135.194	12.2624	1829.61	235.656	6.26	3.77375	0.486064	3.78695	0.343485	1.74309	149.204
		F8-4	22.07	1.71	12.9064	39.3035	5.38167	510.21	84.321	6.05	2.31178	0.382062	2.29845	0.314717	2.14538	94.8052		F8-4	38.18	3.09	12.356	200.146	5.38167	1278.25	332.996	6.44	3.34795	0.872173	6.47722	0.174164	1.66376	237.519		F8-4	22.778	2.04	11.1657	101.303	26.9431	1906.78	223.67	6.45	8.37115	0.981957	4.96586	1.32074	2.20792	70.7705
		F8-5	16.19	1.13	14.3274	36.61	13.0321	500.34	60.001	6.14	3.09043	0.370605	3.23982	1.15328	1.63892	38.3928		F8-5	27.4	2.11	12.9858	189.902	13.0321	1160.66	270.414	6.63	4.23599	0.986911	9.0001	0.617636	1.42396	89.0616		F8-5	25.4901	1.83	13.929	86.61	24.0427	1693.33	141.482	6.45	6.64308	0.555049	4.73279	1.31381	1.63356	70.43
		F12-1	58.36	5.26	11.0951	40.9042	12.2037	812.352	206.57	5.58	1.39197	0.353958	0.777647	0.23201	5.05009	66.566		F12-1	53.59	4.32	12.4051	216.512	68.0968	2374.33	516.035	5.76	4.43055	0.962931	5.01185	1.57632	2.3834	34.867		F12-1	59.2833	4.86	12.1982	100.904	70.0749	1855.92	222.83	5.55	3.1306	0.375874	2.07622	1.44187	2.20833	26.4849
		F12-2	47.54	4.12	11.5388	39.6495	14.32	902.12	130	5.87	1.8976	0.273454	0.962367	0.347573	3.27873	62.9972		F12-2	42.68	3.73	11.4424	197.512	42.4695	1743.47	437.621	5.97	4.08499	1.02535	5.29522	1.13859	2.21567	41.0523		F12-2	51.5929	4.21	12.2548	102.65	37.2619	1609	235.887	5.67	3.11865	0.457209	2.43823	0.88508	2.29799	43.1809
		F12-3	32.94	2.64	12.4773	38.3415	8.54	503.2	110	5.97	1.52763	0.33394	1.45233	0.323485	2.86895	58.9227		F12-3	38.15	3.03	12.5908	200.657	21.6707	1627.63	316.858	6.24	4.2664	0.830558	6.62233	0.715205	1.5791	75.1074		F12-3	32.2737	2.26	14.2804	102.834	18.0239	1737.09	198.887	5.9	5.38235	0.616249	4.55018	0.797517	1.93405	96.3769
		F12-4	19.19	1.19	16.1261	32.9409	4.33	489.21	121	6.07	2.5493	0.630537	2.76814	0.363866	3.67325	112.982		F12-4	31.05	2.53	12.2727	196.868	11.5519	1588.14	374.887	6.39	5.11479	1.20737	7.78136	0.456599	1.90426	137.478		F12-4	39.5454	2.91	13.5895	92.4941	14.1311	2230.04	121.501	5.72	5.63919	0.307244	3.17849	0.485606	1.31361	157.811
		F12-5	19.05	1.18	16.1441	33.0755	4.03	420.1	100.5	6.19	2.20525	0.527559	2.80301	0.341525	3.0385	104.243		F12-5	28.55	2.24	12.7455	202.019	15.3456	1420.26	207.718	6.39	4.97463	0.727559	9.01872	0.68507	1.02821	92.5515		F12-5	21.5413	2.32	9.28503	96.1076	22.8003	623.633	149.851	5.8	2.89506	0.695646	4.14257	0.982771	1.5592	27.352
[truncated: 45 more columns]

## Sheet: 工作表2
Spring of 2015										Summer of 2015										Autumn of 2015										Spring of 2016										Summer of 2016
		SOC(g kg-1)	TN(g kg-1)	C/N	DON(mg kg-1)	MBN(mg kg-1)	MBC(mg kg-1)	DOC(mg kg-1)	pH			SOC(g kg-1)	TN(g kg-1)	C/N	DON(mg kg-1)	MBN(mg kg-1)	MBC(mg kg-1)	DOC(mg kg-1)	pH			SOC(g kg-1)	TN(g kg-1)	C/N	DON(mg kg-1)	MBN(mg kg-1)	MBC(mg kg-1)	DOC(mg kg-1)	pH			SOC(g kg-1)	TN(g kg-1)	C/N	DON(mg kg-1)	MBN(mg kg-1)	MBC(mg kg-1)	DOC(mg kg-1)	pH			SOC(g kg-1)	TN(g kg-1)	C/N	DON(mg kg-1)	MBN(mg kg-1)	MBC(mg kg-1)	DOC(mg kg-1)	pH
CK	F1-1	36.85	2.95	12.4915	48.8016	12.2407	782.889	97.867	6.18	CK	F1-1	51.56	3.91	13.1867	214.369	63.6435	1353.09	495.439	5.51	CK	F1-1	59.9736	4.36	13.7554	130.802	54.5157	2880.96	304.075	6.04	CK	F1-1	32.404	2.67541	12.1118	77.8489	22.5185	401.263	174.927	6	CK	F1-1	49.6261	4.12228	12.0385	105.262	286.031	372.105	182.87	6.29
	F1-2	36.93	2.96	12.4764	40.5828	10.8704	582.328	87.8	6.44		F1-2	36.13	2.84	12.7218	194.833	34.7135	1781.79	430.564	6.14		F1-2	49.3805	3.5	14.1087	118.583	38.9511	1567.91	296.392	6.76		F1-2	29.5461	2.52932	11.6814	83.9821	20	400.737	164.147	6.08		F1-2	43.492	3.60633	12.0599	90.7346	236.574	761.263	167.378	6.36
	F1-3	31.88	2.37	13.4515	38.9034	7.00571	421.3	60.145	6.71		F1-3	31.6	2.35	13.4468	212.218	41.0057	1527.45	414.907	6.05		F1-3	42.1254	2.73	15.4306	102.49	18.4641	1292.1	190.874	6.15		F1-3	24.9282	2.07034	12.0406	75.4035	19	415.632	140.696	6.15		F1-3	34.9675	2.60964	13.3994	96.4315	278.131	810.737	170.237	6.38
	F1-4	27.97	1.94	14.4175	36.5808	1.49282	420.1	60.124	6.51		F1-4	30.04	2.26	13.292	203.477	1.49282	1457.38	349.215	6.59		F1-4	35.8141	2.32	15.4371	103.458	14.5254	1910.96	202.545	6.54		F1-4	20.0611	1.67948	11.9449	70	13	390.123	130	6.22		F1-4	22.6509	1.45828	15.5327	91.0599	247.509	775.053	161.414	6.45
	F1-5	23.55	1.96	12.0153	30.0804	5.00535	3	50.013	6.9		F1-5	37.25	2.98	12.5	200.081	21.0053	1541.71	307.978	6.57		F1-5	30.9134	1.99	15.5343	100.208	9.95096	1827.17	135.03	6.7		F1-5	20.4787	1.70746	11.9936	65	15	372	121	6.28		F1-5	23.2285	1.59865	14.5301	85.462	237.636	770.316	159.604	6.47
	F5-1	42.26	3.47	12.1787	42.3312	7.44444	587.888	132.09	5.52		F5-1	55.29	4.38	12.6233	233.261	59.2386	1944.03	542.63	5.73		F5-1	62.5141	4.68	13.3577	121.433	50.5441	2002.13	281.346	5.85		F5-1	63.3897	3.81597	16.6117	79.3992	22.0741	437.947	154.143	5.88		F5-1	51.139	4.31896	11.8406	82.3966	248.822	366.053	155.786	6.08
	F5-2	41.98	3.55	11.8254	36.1484	11.2222	772.653	116.55	5.89		F5-2	31.41	2.47	12.7166	202.537	35.4885	2078.5	444.648	5.52		F5-2	46.2817	3.29	14.0674	96.1484	41.7313	1841.11	249.25	6.27		F5-2	40.8618	2.78847	14.6538	65.2253	20.963	440.632	134.564	5.99		F5-2	43.841	3.71377	11.805	83.7467	335.16	892.211	170.734	6.11
	F5-3	28.42	2.38	11.9412	30.2199	5.21	600.32	94.234	5.72		F5-3	25.98	1.92	13.5312	203.843	18.3854	1424.1	366.049	6.49		F5-3	33.9092	2.27	14.938	100.22	32.3798	1656.77	221.629	6.25		F5-3	32.6868	2.29217	14.2602	69.4683	9.92593	429.421	142.504	6.02		F5-3	36.9237	2.9097	12.6899	87.3119	321.227	858.421	159.036	6.2
	F5-4	24.86	1.61	15.441	34.8945	3.43	586.32	80.324	5.97		F5-4	26.22	1.92	13.6562	212.299	5.77386	1401.99	280.71	6.45		F5-4	18.8613	1.01	18.6746	98.4895	27.8199	2179.3	185.769	6.44		F5-4	18.0102	1.52771	11.789	65	11	410	131	6.13		F5-4	19.2269	1.10943	17.3304	86.1546	269.897	761.158	150.009	6.25
	F5-5	25.1	1.62	15.4938	31.4151	4.22	587.12	74.324	5.9		F5-5	24.08	1.76	13.6818	195.12	18.0803	1358.32	295.127	6.47		F5-5	14.1724	0.78	18.1697	111.415	17.5796	1863.17	207.566	6.36		F5-5	11.9353	1.31866	9.05112	66	12	392	129	6.16		F5-5	22.8754	1.53909	14.8629	109.532	247.337	861.368	199.973	6.3
	F10-1	39.125	3	13.0417	43.5664	9.54259	673.388	102.978	5.82		F10-1	52.995	3.935	13.4676	218.815	61.441	1636.56	507.035	5.59		F10-1	60.8139	4.31	14.1099	121.117	52.5299	2429.55	280.71	5.915		F10-1	57.8969	3.45694	16.748	75.6241	21.2963	410	150.453	6.094		F10-1	57.3825	4.22062	13.5958	90.8293	237.427	369.079	172.328	6.175
	F10-2	39.025	3.045	12.8161	36.3656	10.7463	665.491	90.175	6.135		F10-2	33.34	2.445	13.636	193.685	35.101	1918.14	425.606	5.8		F10-2	47.4011	3.185	14.8826	102.366	40.3412	1692.51	260.821	6.485		F10-2	36.9325	2.8957	12.7543	71.6037	19.4815	400	139.356	6.135		F10-2	46.65	3.66005	12.7457	84.2406	255.867	826.737	170.056	6.215
	F10-3	29.72	2.165	13.7275	32.5616	5.80785	498.81	65.1895	6.185		F10-3	28.36	1.925	14.7325	203.03	29.6955	1463.78	378.478	6.24		F10-3	37.5873	2.29	16.4137	96.3551	25.422	1462.44	194.252	6.17		F10-3	30.0748	2.81254	10.6931	69.4359	13.463	352	141.16	6.185		F10-3	34.9456	2.75967	12.663	88.8717	269.679	834.579	165.364	6.289
	F10-4	25.985	1.565	16.6038	33.7377	2.16141	491.21	58.224	6.21		F10-4	27.7	1.88	14.734	202.888	3.63334	1417.69	302.963	6.49		F10-4	26.9077	1.455	18.4933	95.9738	21.1727	2033.13	182.157	6.46		F10-4	19.6897	1.7036	11.5577	64.5	11	345	132.5	6.075		F10-4	18.9389	1.28385	14.7516	85.6073	228.703	768.105	156.271	6.33
	F10-5	23.895	1.58	15.1234	28.7478	4.31267	283.06	50.1685	6.37		F10-5	30.235	2.16	13.9977	192.6	19.5428	1438.02	289.553	6.49		F10-5	22.1129	1.175	18.8194	100.812	13.7653	1833.17	159.298	6.5		F10-5	19.207	1.31306	14.6277	62.5	12.5	300	122.213	6.122		F10-5	25.0519	1.56887	15.9682	94.4967	212.486	25.0519	180.788	6.3985
LT	F6-1	37.4	3.05	12.2623	41.7371	8.5	661.996	122.17	5.84	LT	F6-1	54.74	4.39	12.4692	212.506	67.9972	2109	531.211	5.69	LT	F6-1	52.2548	3.84	13.608	127.737	49.6565	2338.13	352.867	5.72	LT	F6-1	51.8433	3.11344	16.6515	81.7643	25.2593	394.842	178.416	6	LT	F6-1	48.1132	3.9256	12.2563	126.499	421.901	869.263	193.591	6.07
	F6-2	32.47	2.52	12.8849	42.7395	4.64815	657.564	101.02	5.73		F6-2	39.63	3.2	12.3844	192.582	42.2962	1807.84	434.951	6.19		F6-2	26.1822	2.9	9.02836	102.74	52.4036	1554.03	288.54	6.19		F6-2	39.843	2.6615	14.9701	71.6624	9.18519	416.316	141.615	6.09		F6-2	43.143	3.49889	12.3305	80.8063	288.458	801.368	141.935	6.13
	F6-3	31.7	2.38	13.3193	40.9504	7.65	653.21	85.632	5.81		F6-3	35.42	2.76	12.8333	202.526	25.9945	1327.21	370.517	6.3		F6-3	40.2409	1.44	27.945	120.95	15.8635	1596.99	224.936	5.97		F6-3	29.0682	2.14498	13.5517	74.24	8	380.474	138.527	6.11		F6-3	33.0114	2.30957	14.2933	90.0765	325.482	766.842	169.327	6.3
	F6-4	23.87	1.58	15.1076	36.0567	8.88	580.32	79.212	6.13		F6-4	32.33	2.42	13.3595	198.262	15.84	1375.35	359.553	6.47		F6-4	25.8751	1.59	16.2736	96.0567	16.6851	1854.24	225.834	6.34		F6-4	26.1163	1.9714	13.2476	72	7	362	132	6.13		F6-4	26.0748	1.80712	14.429	81.15	282.186	835.158	157.221	6.54
	F6-5	21.56	1.41	15.2908	30.1934	6.53	550.21	77.3576	5.9		F6-5	26.32	1.93	13.6373	196.763	9.73206	1309.54	287.288	6.69		F6-5	23.4725	1.4	16.766	100.193	16.2159	1521.28	180.465	6.06		F6-5	14.7357	1.39511	10.5624	71	6.4	330	129	6.22		F6-5	23.5816	1.6582	14.2212	79.4811	255.065	755.053	149.448	6.41
	F2-1	40.1	2.94	13.6395	40.9286	15.4444	935.905	126.77	5.84		F2-1	56.23	4.49	12.5234	209.629	59.1506	1292.15	509.026	5.73		F2-1	69.2529	4.57	15.1538	116.493	46.6893	2471.5	315.106	5.54		F2-1	33.4271	2.71741	12.3011	71.61	30.7407	469.368	167.752	5.92		F2-1	46.482	3.88816	11.9548	89.9315	287.494	924.737	174.062	6.16
	F2-2	37.85	2.89	13.0969	39.0444	14.7778	793.067	114.97	6.34		F2-2	35.7	2.83	12.6148	192.311	40.7188	1639.25	384.105	6.54		F2-2	42.4809	3.01	14.1133	103.604	8.5	1200	246.764	6.06		F2-2	28.9773	2.43684	11.8913	64.5063	21.7778	473.895	137.093	6.09		F2-2	39.1527	2.9443	13.2978	106.844	347.018	925.368	187.464	6.42
	F2-3	28.83	2.02	14.2723	33.7812	8.5	623.21	92.231	6.47		F2-3	35.48	2.77	12.8087	200.232	18.2858	1557.91	360.29	6.31		F2-3	30.7298	2.04	15.0636	120.378	8.27973	1111.88	254.98	6.14		F2-3	27.0031	2.24185	12.045	67.0298	2.96296	362.263	142.977	6.14		F2-3	34.0058	2.60367	13.0607	97.1601	279.276	786.211	173.961	6.44
	F2-4	29.58	1.91	15.4869	35.9019	5.2	600.21	92.456	6.98		F2-4	26.64	1.85	14.4	205.811	12.5922	1327.85	321.503	6.33		F2-4	31.8803	2.01	15.8608	105.902	15.1272	1611.68	229.507	6.15		F2-4	24.1633	1.88459	12.8215	62	12	352	132	6.22		F2-4	25.0724	1.52562	16.4342	104.086	295.955	799.158	178.335	6.5
	F2-5	23.35	1.6	14.5938	32.0079	5.8	599.21	80.231	6.92		F2-5	26.62	1.91	13.9372	200.85	17.8788	1387.02	331.665	6.83		F2-5	29.3744	1.82	16.1398	102.008	77.3416	2415.53	154.862	6.1		F2-5	20.1633	1.45934	13.8167	61	19	332	129	6.3		F2-5	20.1983	1.2735	15.8605	96.9433	250.759	775.579	171.755	6.61
	F3-1	45.53	3.76	12.109	41.53	14.6111	947.15	162.13	5.84		F3-1	57.58	4.64	12.4095	226.561	64.5124	1693.75	590.057	5.83		F3-1	59.2088	4.32	13.7057	124.53	48.2488	2510.93	304.64	5.79		F3-1	39.6763	2.52598	15.7073	85.886	13.8519	444.053	177.562	5.94		F3-1	46.482	3.88816	11.9548	88.3686	223.254	776	161.798	5.99
	F3-2	42.58	3.56	11.9607	39.6037	9.51852	793.107	106.98	5.93		F3-2	46.96	3.85	12.1974	184.262	46.8173	2118.84	447.79	6.21		F3-2	49.3335	3.71	13.2974	102.604	46.1749	1282.03	234.702	6.23		F3-2	32.329	2.94084	10.9931	75.5625	3.33333	392.158	157.147	6.12		F3-2	36.5638	2.98737	12.2395	91.1117	242.755	658.421	151.228	6.13
	F3-3	31.22	2.19	14.2557	38.1037	8.45	744.21	80.324	0		F3-3	34.49	2.54	13.5787	200.232	9.39921	1299.44	361.284	6.53		F3-3	40.8871	2.91	14.0506	112.104	24.3306	1643.51	246.171	6.16		F3-3	29.187	1.83992	15.8632	73.3436	3	384.632	147.15	6.18		F3-3	32.9662	2.37413	13.8856	85.2764	275.774	810	164.51	6.22
	F3-4	27.68	1.54	17.974	32.2981	7.55	700.21	76.554	6.15		F3-4	30.55	2	15.275	203.273	1.95022	1384.89	331.711	6.54		F3-4	31.1279	1.75	17.7874	100.298	15.8083	1948.66	193.188	6.33		F3-4	24.5295	1.83992	13.3318	70	11	392	131	6.24		F3-4	25.3118	1.31132	19.3025	89.0241	230.844	574.842	150.848	6.35
	F3-5	22.43	1.23	18.2358	30.2962	6.54	687.23	70.123	6.28		F3-5	23.32	1.55	15.0452	190.264	24.4952	1284.8	275.175	6.51		F3-5	24.9	1.63	15.2761	100.83	11.6047	1308.75	162.476	6.05		F3-5	21.9039	2.14283	10.222	69	12	374	130	6.26		F3-5	19.8358	1.00752	19.6876	92.3332	256.845	767.053	162.199	6.35
MT	F9-1	58.05	5.1	11.3824	43.239	19.537	627.351	168.52	5.36	MT	F9-1	57.9	4.94	11.7206	220.142	71.4948	2207.13	574.23	5.77	MT	F9-1	57.0483	4.77	11.9598	113.239	23.008	1585.6	247.294	5.83	MT	F9-1	59.229	3.55554	16.6582	72.502	40.7407	146.789	147.109	5.88	MT	F9-1	60	5.52489	10.86	67.5682	180.654	453.474	125.717	6.19
	F9-2	47.42	3.99	11.8847	40.9387	13.4444	559.621	133.73	5.72		F9-2	46.41	3.94	11.7792	198.149	47.9095	2028.29	395.78	6.28		F9-2	45.4766	3.92	11.6012	97.5894	17.759	1312.86	217.65	6.18		F9-2	46.8056	3.02153	15.4907	94.3794	20	79.2105	152.822	5.97		F9-2	50.9756	4.0658	12.5376	104.49	297.167	620.632	192.041	6.21
	F9-3	40.95	3.14	13.0414	34.1256	11.43	523.21	112.87	6		F9-3	44.82	3.71	12.0809	211.079	27.8741	1628.06	423.375	6.08		F9-3	41.9594	3.66	11.4643	134.126	51.1308	2786.49	177.862	6.31		F9-3	40.0283	2.55578	15.6619	69.156	8.81481	33.6316	140.935	6.03		F9-3	44.1012	3.43139	12.8523	78.878	237.077	580.316	144.956	6.26
	F9-4	37.12	2.77	13.4007	33.99	7.22	490.21	100.794	5.81		F9-4	36.41	2.76	13.192	195.159	21.0397	1372.87	339.043	6.3		F9-4	35.7985	2.77	12.9237	98.299	47.1324	2270.26	192.736	6.4		F9-4	29.5044	2.06244	14.3056	63	22	63	130	6.12		F9-4	40.683	3.03432	13.4076	72.3353	209.63	556.421	130.616	6.31
	F9-5	25.22	1.75	14.4114	34.8515	4.32	454.2	81.234	5.89		F9-5	35.77	2.85	12.5509	214.832	18.2813	1846.03	335.117	6.33		F9-5	27.7656	2.03	13.6776	86.4851	42.8381	3030.67	141.095	6.4		F9-5	11.6778	1.30765	8.93038	57	43	42	121	6.23		F9-5	25.3397	1.74992	14.4805	66.7032	168.212	487.474	120.601	6.45
	F11-1	55.88	5.09	10.9784	42.3023	17.9259	736.023	168.24	5.73		F11-1	58.31	5.19	11.2351	210.389	70.0647	2403.43	497.173	5.68		F11-1	59.2433	5.41	10.9507	119.43	47.9318	1496.69	238.182	6.16		F11-1	58.8258	3.62782	16.2152	83.8736	16.8889	129	160.02	5.88		F11-1	70.5677	6.25385	11.2839	66.0751	258.224	475.158	121.179	6.07
	F11-2	49.55	4.43	11.1851	39.2072	10.4444	649.982	81.03	5.74		F11-2	46.31	4.21	11	218.82	37.2063	1961.69	426.907	6.15		F11-2	52.1429	4.45	11.7175	79.2072	40.1583	1634.46	161.108	6.43		F11-2	55.4226	3.61334	15.3383	68.7401	17.5556	105.105	141.09	5.94		F11-2	49.6307	4.39238	11.2993	93.8682	256.207	629.368	191.023	6.15
	F11-3	38.73	3.11	12.4534	37.8361	10.54	534.21	94.2	5.92		F11-3	42.85	3.7	11.5811	226.447	41.1607	1559.15	485.046	6.44		F11-3	34.5432	2.55	13.5464	97.8361	28.474	2680.41	187.683	6.51		F11-3	47.9044	3.11079	15.3994	75.7215	13	28.7368	158.327	6.01		F11-3	44.2104	3.81627	11.5847	82.5141	221.315	533.579	151.856	6.23
	F11-4	31.47	2.1	14.9857	35.0169	9.43	512.22	82.1	6.17		F11-4	32.54	2.57	12.6615	196.45	17.1024	1424.49	361.146	6.6		F11-4	28.2979	2.53	11.1849	95.0169	37.9969	2190.59	219.172	6.63		F11-4	31.6013	2.2115	14.2895	69	11	21	143	6.05		F11-4	37.2978	2.74783	13.5735	80.5123	172.401	465.895	135.691	6.37
	F11-5	20.18	1.1	18.3455	30.2496	4.33	499.32	59.331	6.83		F11-5	31.27	2.24	13.9598	194.241	17.9732	1480.27	320.524	6.8		F11-5	27.0629	2.04	13.2661	90.925	21.8699	2224.84	144.877	6.44		F11-5	20.9188	1.70506	12.2687	66	14	20	139	6.1		F11-5	29.9821	2.12432	14.1137	71.7422	169.137	412	130.873	6.44
	F7-1	52.41	4.83	10.8509	44.6	13.0926	1148.42	174.04	5.32		F7-1	58.16	5.1	11.4039	200.693	57.3492	2197.38	471.845	5.77		F7-1	58.1232	4.25	13.6761	124.6	47.4829	1382.89	254.418	5.88		F7-1	59.8126	3.5481	16.8576	75.8276	40.5926	485.895	157.889	5.95		F7-1	49.1248	3.90607	12.5765	77.0523	270.535	806.947	145.046	6.15
	F7-2	49.36	3.29	15.003	42.7344	11.6481	659.096	133.68	5.82		F7-2	43.76	3.68	11.8913	196.281	38.8157	2047.79	469.863	6.28		F7-2	42.6703	3.07	13.8991	112.734	45.5085	1823.31	210.562	6.41		F7-2	43.4192	2.86723	15.1433	70.0416	15.7778	459.579	134.508	6.09		F7-2	40.4755	3.27113	12.3736	96.1536	308.66	783.579	168.425	6.2
	F7-3	34.12	2.83	12.0565	31.349	10.14	621.23	120.231	5.87		F7-3	40.75	3.44	11.8459	212.667	37.6209	1486.05	443.562	6.08		F7-3	39.3463	2.7	14.5727	101.349	2.23413	1451.02	184.142	6.49		F7-3	38.7272	2.53358	15.2856	74.24	8.66667	410.263	155.556	6		F7-3	40.0785	3.14261	12.7532	98.6434	307.734	754.211	174.86	6.29
	F7-4	29.47	2.24	13.1562	30.7774	9.54	590.32	76.543	5.97		F7-4	38.7	3.03	12.7723	202.167	28.2825	1433.57	335.644	6.3		F7-4	27.8842	2.12	13.1529	95.7774	13.9746	1936.08	154.762	6.77		F7-4	25.2026	1.86983	13.4786	68	18	392	132	6.2		F7-4	33.7909	2.41943	13.9664	105.112	329.143	847.579	185.94	6.36
	F7-5	16.93	1.01	16.7624	30.3722	8.43	565.21	70.321	6.08		F7-5	31.7	2.51	12.6295	211.355	13.4686	1310.3	347.126	6.33		F7-5	32.5748	1.68	19.3898	98.3722	69.836	2920.2	148.095	6.63		F7-5	20.8337	1.63718	12.7253	64	22	330	129	6.24		F7-5	33.9747	2.38568	14.2411	99.1613	308.768	844.842	175.421	6.39
HT	F4-1	54.23	4.5	12.0511	42.2022	7.14815	509.644	130.13	5.69	HT	F4-1	54.86	4.57	12.0044	208.571	67.9482	2103.55	515.577	5.93	HT	F4-1	58.4853	4.21	13.892	119.72	60.2888	1948.66	294.365	5.83	HT	F4-1	46.1916	3.11746	14.817	80.0964	30	291.895	170.357	5.94	HT	F4-1	53.9959	4.38772	12.3061	106.945	311.711	808	198.256	6.01
	F4-2	39.72	3.06	12.9804	40.9961	9.53704	638.076	130.13	5.93		F4-2	44.59	3.62	12.3177	195.383	40.4151	2145.26	446.911	6.18		F4-2	48.2488	3.68	13.1111	115.4	16.2978	1308.75	263.918	5.86		F4-2	31.6266	2.73721	11.5543	70.6681	20	328.842	162.186	5.96		F4-2	38.4833	3.09481	12.4348	103.12	283.866	783.263	170.543	6.11
	F4-3	31.18	2.11	14.7773	41.7296	10.13	600.21	121.9	5.92		F4-3	41.4	3.32	12.4699	213.829	13.4127	1350.35	338.411	6.29		F4-3	41.3145	2.88	14.3453	121.073	47.9428	1972.73	286.703	5.84		F4-3	26.7911	2.23302	11.9977	69.7288	5	315.842	153.804	6.04		F4-3	32.2648	2.27397	14.1888	96.7989	268.801	777.684	169.718	6.22
	F4-4	24.8	1.6	15.5	37.7773	6.55	587.32	110.43	6.13		F4-4	31.45	2.31	13.6147	201.256	12.8287	1461.55	336.355	6.51		F4-4	35.3262	2.36	14.9687	97.9777	23.6826	1519.32	182.125	5.95		F4-4	23.1643	1.83375	12.6322	65	11	300	141	6.16		F4-4	21.0004	1.06186	19.777	83.7385	261.104	750	164.887	6.34
	F4-5	20.1	1.4	14.3571	36.6212	5.34	564.32	82.34	blank		F4-5	31.8	2.34	13.5897	195.12	9.2101	1457.75	297.47	6.42		F4-5	30.346	1.81	16.7657	102.762	20.1905	1408.34	180.645	5.85		F4-5	20.0334	1.58953	12.6034	61	6	289	131	6.2		F4-5	35.1386	1.68125	20.9003	78.2003	259.057	762.421	143.468	6.39
	F8-1	55.04	4.37	12.595	41.613	7.88889	395.743	137.55	5.43		F8-1	50.57	4.16	12.1562	213.516	68.7176	1832.39	486.658	5.91		F8-1	65.5082	4.8	13.6475	117.613	54.7868	1237.13	258.475	5.93		F8-1	47.7862	3.52202	13.5678	76.6241	30.5926	389.947	133.242	5.86		F8-1	52.9308	4.16334	12.7135	96.5067	332.773	822	159.704	6.16
	F8-2	44.03	3.9	11.2897	41.8112	8.09259	492.019	112.87	5.76		F8-2	43	3.63	11.8457	196.523	44.2348	1751.04	427.991	6.18		F8-2	49.6071	3.75	13.2285	89.8112	37.4248	1313.56	203.814	6.26		F8-2	37.7958	2.09255	18.0621	74.6627	4.51852	342.579	157.428	6.02		F8-2	51.2716	4.26082	12.0333	86.5016	270.434	727.053	155.866	6.21
	F8-3	42.42	3.38	12.5503	40.194	5.68094	521.23	93.213	6.12		F8-3	42.2	3.66	11.5301	199.717	25.6809	1469.47	376.857	6.35		F8-3	48.4825	3.57	13.5805	135.194	12.2624	1829.61	235.656	6.26		F8-3	30.3175	2.07481	14.6122	71.1911	1.51852	287.579	144.414	6.03		F8-3	40.2163	3.23529	12.4305	75.3504	216.435	488.421	138.931	6.31
	F8-4	22.07	1.71	12.9064	39.3035	5.38167	510.21	84.321	6.05		F8-4	38.18	3.09	12.356	200.146	5.38167	1278.25	332.996	6.44		F8-4	22.778	2.04	11.1657	101.303	26.9431	1906.78	223.67	6.45		F8-4	26.2635	1.91122	13.7418	65	12	273	139	6.15		F8-4	30.9175	2.29614	13.465	74.2836	177.088	395.684	144.395	6.45
	F8-5	16.19	1.13	14.3274	36.61	13.0321	500.34	60.001	6.14		F8-5	27.4	2.11	12.9858	189.902	13.0321	1160.66	270.414	6.63		F8-5	25.4901	1.83	13.929	86.61	24.0427	1693.33	141.482	6.45		F8-5	23.5863	1.72229	13.6947	55	1	243	123	6.21		F8-5	28.3655	1.96381	14.4441	69.0013	167.088	465.368	125.382	6.5
	F12-1	58.36	5.26	11.0951	40.9042	12.2037	812.352	206.57	5.58		F12-1	53.59	4.32	12.4051	216.512	68.0968	2374.33	516.035	5.76		F12-1	59.2833	4.86	12.1982	100.904	70.0749	1855.92	222.83	5.55		F12-1	48.7353	4.3115	11.3036	88.5678	35.9259	214.368	141.846	5.86		F12-1	50.4522	4.35115	11.5951	68.8298	349.766	511.789	126.73	6.3
	F12-2	47.54	4.12	11.5388	39.6495	14.32	902.12	130	5.87		F12-2	42.68	3.73	11.4424	197.512	42.4695	1743.47	437.621	5.97		F12-2	51.5929	4.21	12.2548	102.65	37.2619	1609	235.887	5.67		F12-2	38.2478	3.04378	12.5659	69.7288	13.3333	112	133.217	5.93		F12-2	42.3088	3.62886	11.659	97.4527	281.491	596.947	174.699	6.31
	F12-3	32.94	2.64	12.4773	38.3415	8.54	503.2	110	5.97		F12-3	38.15	3.03	12.5908	200.657	21.6707	1627.63	316.858	6.24		F12-3	32.2737	2.26	14.2804	102.834	18.0239	1737.09	198.887	5.9		F12-3	30.0554	3.0501	9.85391	60.0225	13.7037	58.8947	127.882	5.97		F12-3	37.7391	3.03204	12.4468	85.0204	202.728	534.842	144.383	6.37
	F12-4	19.19	1.19	16.1261	32.9409	4.33	489.21	121	6.07		F12-4	31.05	2.53	12.2727	196.868	11.5519	1588.14	374.887	6.39		F12-4	39.5454	2.91	13.5895	92.4941	14.1311	2230.04	121.501	5.72		F12-4	32.6305	2.12416	15.3616	58	12	59	120	6.03		F12-4	37.4667	2.65631	14.1048	82.6572	177.798	512.526	131.006	6.44
	F12-5	19.05	1.18	16.1441	33.0755	4.03	420.1	100.5	6.19		F12-5	28.55	2.24	12.7455	202.019	15.3456	1420.26	207.718	6.39		F12-5	21.5413	2.32	9.28503	96.1076	22.8003	623.633	149.851	5.8		F12-5	23.7265	1.77358	13.3777	54	11	62	112	6.11		F12-5	39.4048	3.43482	11.4722	75.4085	160.795	415.684	133.394	6.54
Note: F1-1 means the soil sample from 0-10cm soil layer of pltot 1 ;
F2-3 means the soil sample from 20-30cm soil layer of pltot 2; All the indexes from the same sampling are from the same independent soil samples
[truncated: 10 more columns]
